# Supplementary material
Source: MDPI journal article supplement (https://www.mdpi.com/2227-9717/10/4/793)
Supplement: s1 [file s1]

# A new LC-MS method for evaluating the efficacy of pesticide residues removal from apple surfaces by washing agents

Magdalena Zarębska <sup>1\*</sup>, Zofia Hordyjewicz-Baran <sup>1</sup>, Tomasz Wasilewski <sup>2</sup>, Ewa Zajszy-Turko<sup>1</sup>, Natalia Stanek <sup>1</sup>

- <sup>1</sup> Łukasiewicz Research Network-Institute of Heavy Organic Synthesis "Blachownia", Energetyków 9, 47-225 Kedzierzyn-Kozle, Poland; [magdalena.zarebska@icso.lukasiewicz.gov.pl](mailto:magdalena.zarebska@icso.lukasiewicz.gov.pl), [zofia.hordyjewicz@icso.lukasiewicz.gov.pl](mailto:zofia.hordyjewicz@icso.lukasiewicz.gov.pl), [ewa.zajszy@icso.lukasiewicz.gov.pl](mailto:ewa.zajszy@icso.lukasiewicz.gov.pl), [natalia.stanek@icso.lukasiewicz.gov.pl](mailto:natalia.stanek@icso.lukasiewicz.gov.pl);
- <sup>2</sup> Department of Industrial Chemistry, Faculty of Chemical Engineering and Commodity Science, Kazimierz Pulaski University of Technology and Humanities in Radom, Chrobrego 27, 26-600 Radom, Poland; [tomasz.wasilewski@uthrad.pl](mailto:tomasz.wasilewski@uthrad.pl);
- \* Correspondence: [magdalena.zarebska@icso.lukasiewicz.gov.pl](mailto:magdalena.zarebska@icso.lukasiewicz.gov.pl); Tel.: 0048 691 606 660

## Table of content

|                                                                                                                                                                                                             |   |
|-------------------------------------------------------------------------------------------------------------------------------------------------------------------------------------------------------------|---|
| <b>Table S1.</b> Mass spectrometer operating parameters used for the determination of selected pesticides. ....                                                                                             | 2 |
| <b>Table S2.</b> Isotopic distributions for individual pesticides and their deuterated analogues: (a) acetamiprid, (b) boscalid, (c) pyraclostrobin, (d) pendimethalin.....                                 | 3 |
| <b>Figure S1.</b> Sample preparing procedure: (a) immersion in a pesticides solution, (b) detergent washing, (c) tap water washing for detergent removal, (d) QuEChERS extraction of the ground apples..... | 4 |

**Table S1.** Mass spectrometer operating parameters used for the determination of selected pesticides.

| Analyte                           | Precursor ion m/z, [M+H] <sup>+</sup> , Da | Main product ions MS <sup>2</sup> m/z, Da | DP, V | EP, V | CE, V | CXP, V |
|-----------------------------------|--------------------------------------------|-------------------------------------------|-------|-------|-------|--------|
| <b>PESTICIDE</b>                  |                                            |                                           |       |       |       |        |
| Acetamiprid – Qualification       | 223                                        | 126                                       | 71    | 10    | 31    | 10     |
| Acetamiprid – Confirmation        | 223                                        | 99                                        | 71    | 10    | 51    | 10     |
| Boscalid – Qualification          | 343                                        | 140                                       | 76    | 10    | 27    | 10     |
| Boscalid – Confirmation           | 343                                        | 112                                       | 76    | 10    | 59    | 10     |
| Pyraclostrobin – Qualification    | 388                                        | 105                                       | 56    | 10    | 59    | 10     |
| Pyraclostrobin – Confirmation     | 388                                        | 120                                       | 56    | 10    | 69    | 8      |
| Pendimethalin – Qualification     | 282                                        | 212                                       | 26    | 10    | 15    | 8      |
| Pendimethalin – Confirmation      | 282                                        | 91                                        | 26    | 10    | 27    | 16     |
| <b>PESTICIDE IZOTOPE ANALOGUE</b> |                                            |                                           |       |       |       |        |
| Acetamiprid-d3 – Qualification    | 228                                        | 128                                       | 66    | 10    | 31    | 10     |
| Acetamiprid-d3 – Confirmation     | 228                                        | 101                                       | 66    | 10    | 53    | 10     |
| Boscalid-d – Qualification        | 349                                        | 142                                       | 86    | 10    | 27    | 10     |
| Boscalid-d4 – Confirmation        | 349                                        | 114                                       | 86    | 10    | 61    | 8      |
| Pyraclostrobin-d6 – Qualification | 394                                        | 105                                       | 61    | 10    | 79    | 8      |
| Pyraclostrobin-d6 – Confirmation  | 394                                        | 120                                       | 61    | 10    | 65    | 8      |
| Pendimethalin-d5 – Qualification  | 287                                        | 212                                       | 61    | 10    | 17    | 14     |
| Pendimethalin-d5 – Confirmation   | 287                                        | 91                                        | 61    | 10    | 39    | 8      |

**DP**-declustering potential, **EP**-entrance potential, **CE**-collision energy, **CXP**-collision cell exit potential

**Table S2.** Isotopic distributions for individual pesticides and their deuterated analogues: (a) acetamiprid, (b) boscalid, (c) pyraclostrobin, (d) pendimethalin.

| m/z ,<br>Da | [M+H] <sup>+</sup> ,<br>Da | Acetamiprid | Acetamiprid-d3 |
|-------------|----------------------------|-------------|----------------|
| 222         | 223                        | 100.0%      |                |
| 223         | 224                        | 12.7%       |                |
| 224         | 225                        | 32.7%       |                |
| 225         | 226                        | 4.0%        | 100.0%         |
| 226         | 227                        | 0.2%        | 12.7%          |
| 227         | 228                        |             | 32.7%          |
| 228         | 229                        |             | 4.0%           |
| 229         | 230                        |             | 0.2%           |

(a)

| m/z,<br>Da | [M+H] <sup>+</sup> ,<br>Da | Pyraclostrobin | Pyraclostrobin-d6 |
|------------|----------------------------|----------------|-------------------|
| 387        | 388                        | 100.0%         |                   |
| 388        | 389                        | 22.5%          |                   |
| 389        | 390                        | 35.2%          |                   |
| 390        | 391                        | 7.5%           |                   |
| 391        | 392                        | 1.0%           |                   |
| 392        | 393                        | 0.1%           |                   |
| 393        | 394                        | 0.0%           | 100.0%            |
| 394        | 395                        |                | 22.5%             |
| 395        | 396                        |                | 35.2%             |
| 396        | 397                        |                | 7.5%              |
| 397        | 398                        |                | 1.0%              |
| 398        | 399                        |                | 0.1%              |

(c)

| m/z ,<br>Da | [M+H] <sup>+</sup> ,<br>Da | Boscalid | Boscalid-d4 |
|-------------|----------------------------|----------|-------------|
| 342         | 343                        | 100.0%   |             |
| 343         | 344                        | 20.9%    |             |
| 344         | 345                        | 66.2%    |             |
| 345         | 346                        | 13.5%    |             |
| 346         | 347                        | 11.6%    | 100.0%      |
| 347         | 348                        | 2.2%     | 20.9%       |
| 348         | 349                        | 0.2%     | 66.2%       |
|             | 350                        |          | 13.5%       |
|             | 351                        |          |             |
|             | 352                        |          | 2.2%        |
|             | 353                        |          | 0.2%        |

(b)

| m/z, Da | [M+H] <sup>+</sup> , Da | Pendimethalin | Pendimethalin-d5 |
|---------|-------------------------|---------------|------------------|
| 281     | 282                     | 100.0%        |                  |
| 282     | 283                     | 15.9%         |                  |
| 283     | 284                     | 1.9%          |                  |
| 284     | 285                     | 0.1%          |                  |
| 285     | 286                     | 0.0%          |                  |
| 286     | 287                     | 0.0%          | 100.0%           |
| 287     | 288                     | 0.0%          | 15.9%            |
| 288     | 289                     | 0.0%          | 1.9%             |
| 289     | 290                     |               | 0.1%             |

(d)

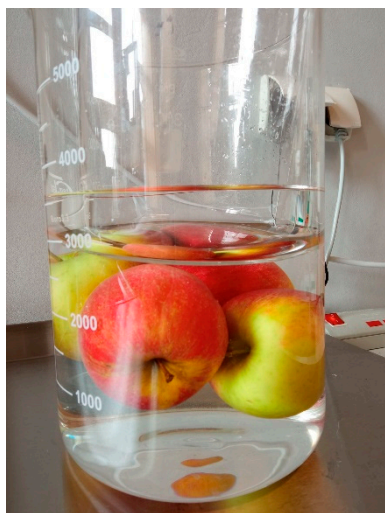

(a)

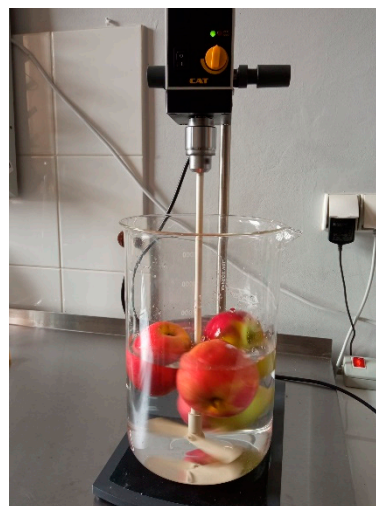

(b)

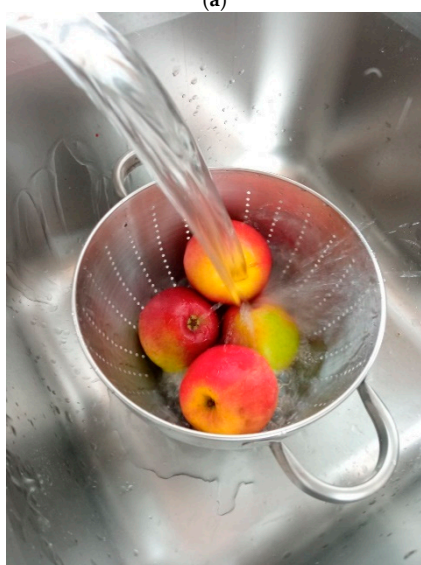

(c)

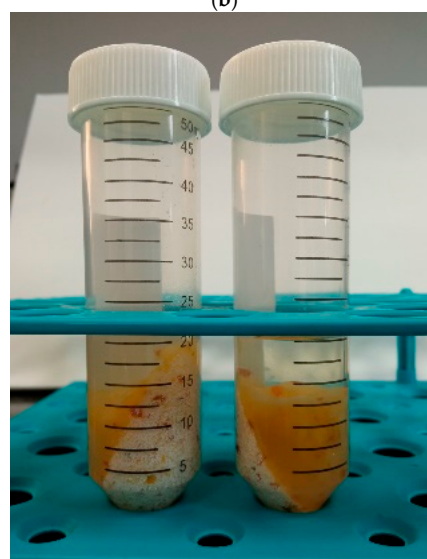

(d)

**Figure S1.** Sample preparing procedure: (a) immersion in a pesticides solution, (b) detergent washing, (c) tap water washing for detergent removal, (d) QuEChERS extraction of the ground apples.
